# Supplementary material for: The Origin of Discrepancies between Predictions and Annotations in Intrinsically Disordered Proteins
Source: MDPI journal article supplement (doi:10.3390/biom13101442), 2023-09-25
Supplement: s1 [file s1]

Figure S1: IUPred and AlphaFold2 pLDDT scores for each residue (left) and region (right) of metamorphic and moonlight proteins represented as a density heatmap

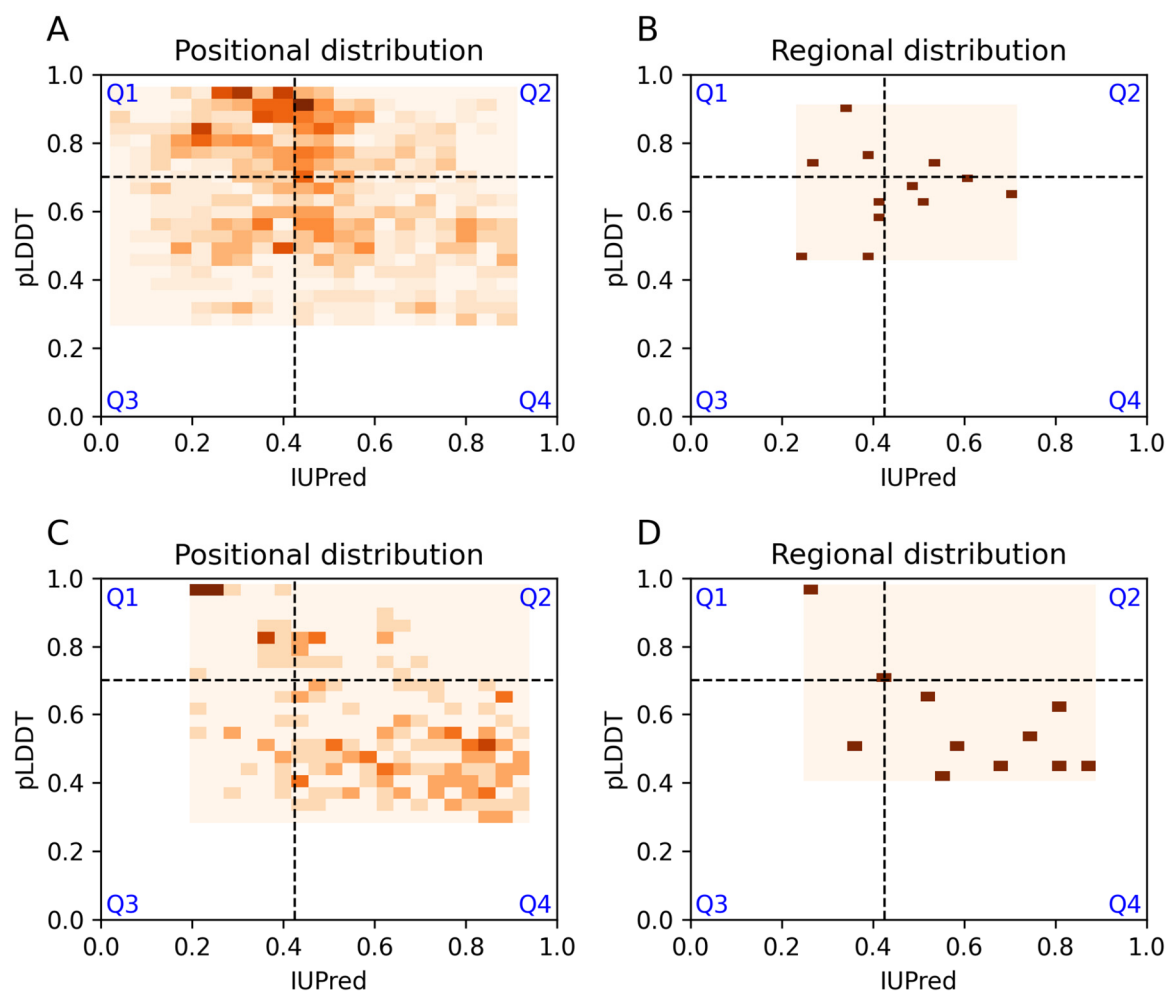

Figure S2: Projected density distribution of IUPred and AlphaFold2 pLDDT scores for each residue (left) and region (right) in DisProt with disordered structural state annotation.

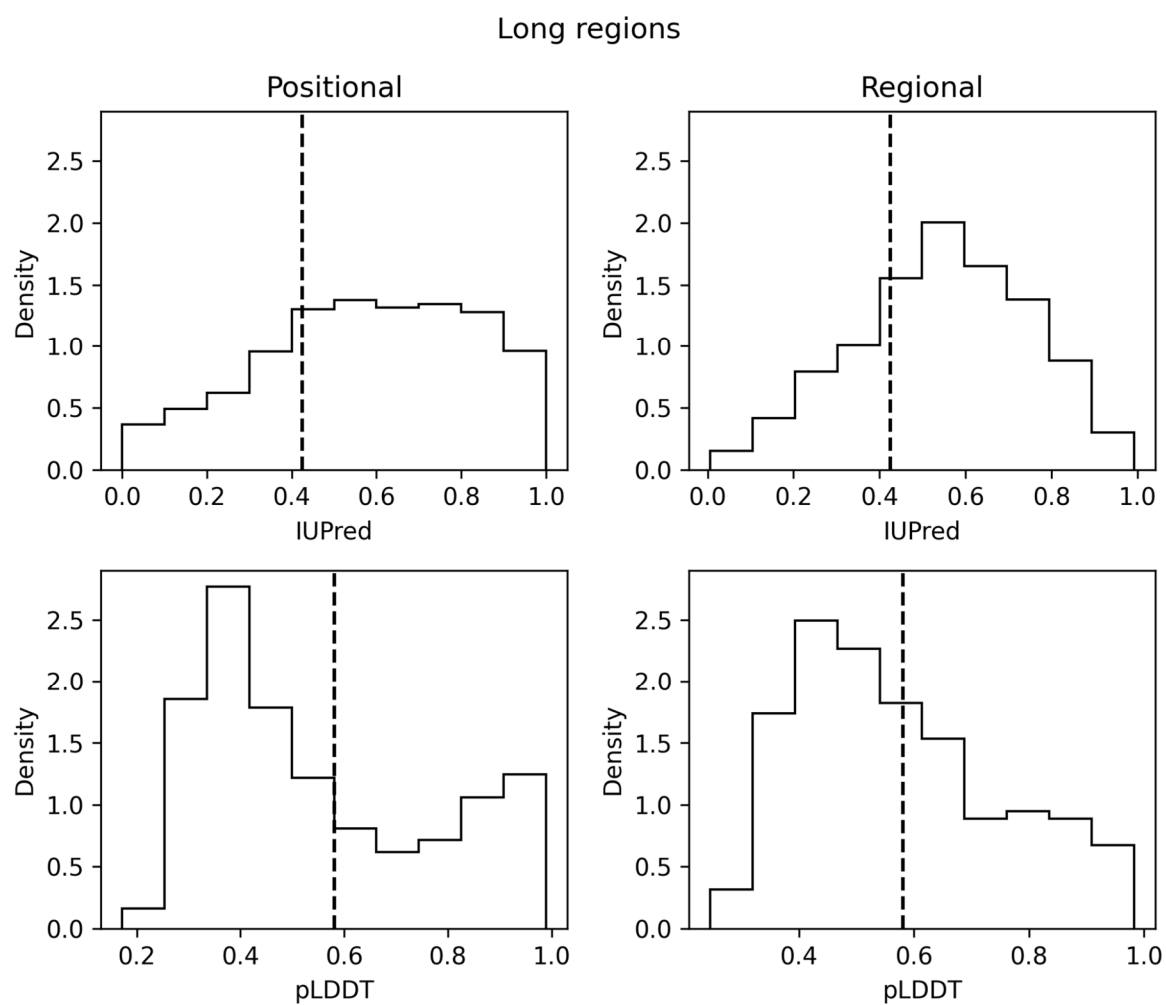

### Short regions

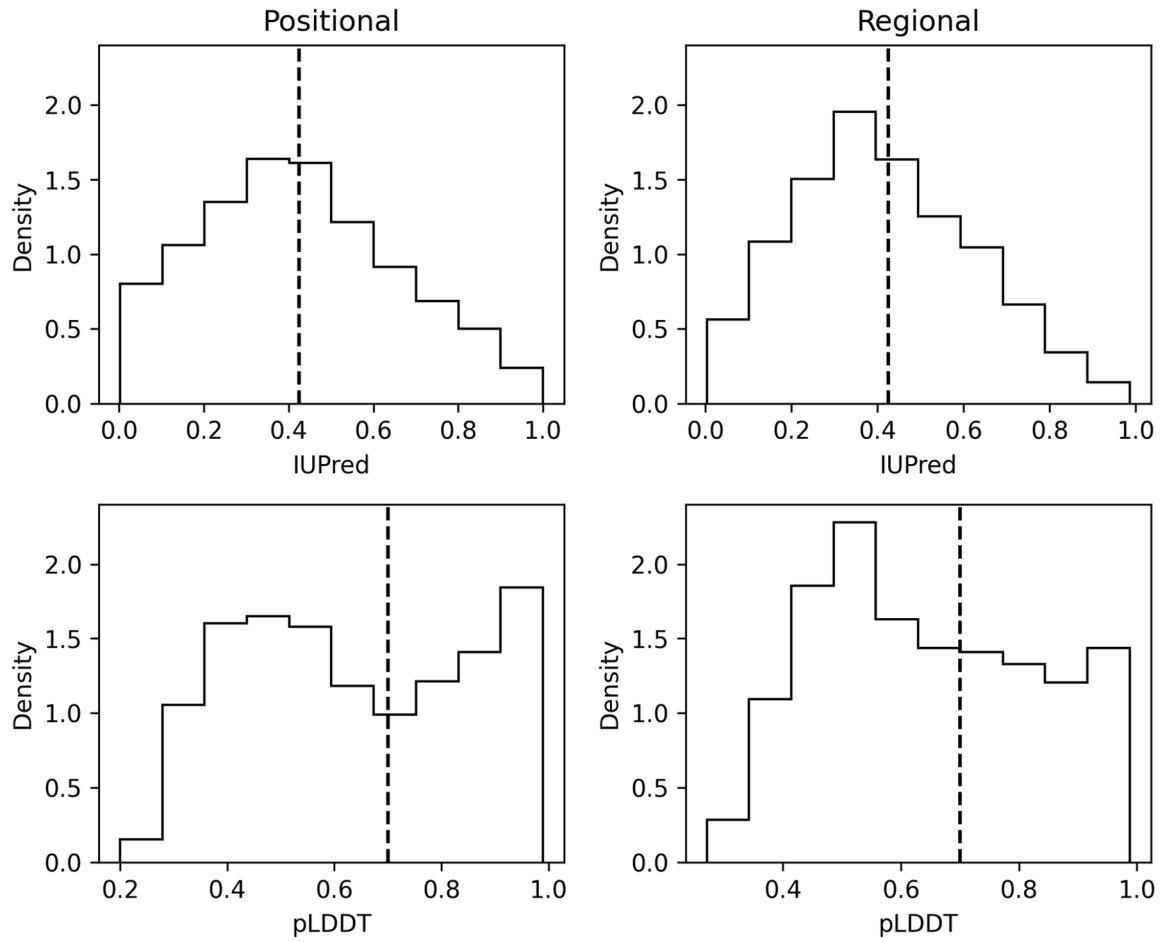

Table S1: IDPO and GO Functional annotations in the DisProt database

|    |            |                              |     |
|----|------------|------------------------------|-----|
| Q1 | IDPO:00076 | disorder                     | 474 |
| Q1 | GO:0005515 | protein binding              | 108 |
| Q1 | IDPO:00050 | disorder to order            | 107 |
| Q1 | GO:0098772 | molecular function regulator | 39  |
| Q1 | IDPO:00502 | flexible linker/spacer       | 24  |
| Q1 | GO:0060090 | molecular adaptor activity   | 23  |
| Q1 | IDPO:00056 | order to disorder            | 14  |
| Q1 | IDPO:00079 | order                        | 12  |
| Q1 | GO:0036094 | small molecule binding       | 11  |
| Q1 | GO:0008289 | lipid binding                | 10  |
| Q1 | GO:0003676 | nucleic acid binding         | 10  |
| Q1 | IDPO:00025 | phosphorylation display site | 8   |

|    |            |                                                     |   |
|----|------------|-----------------------------------------------------|---|
| Q1 | IDPO:00501 | entropic chain                                      | 7 |
| Q1 | GO:0003677 | DNA binding                                         | 7 |
| Q1 | GO:1990000 | amyloid fibril formation                            | 5 |
| Q1 | GO:0003723 | RNA binding                                         | 5 |
| Q1 | GO:0140678 | molecular function inhibitor activity               | 4 |
| Q1 | IDPO:00077 | molten globule                                      | 4 |
| Q1 | GO:0140677 | molecular function activator activity               | 4 |
| Q1 | GO:0140313 | molecular sequestering activity                     | 4 |
| Q1 | GO:0051179 | localization                                        | 4 |
| Q1 | IDPO:00033 | limited proteolysis display site                    | 3 |
| Q1 | GO:0061912 | selective autophagy                                 | 3 |
| Q1 | GO:0097351 | toxin sequestering activity                         | 3 |
| Q1 | GO:0043232 | intracellular non-membrane-bounded organelle        | 2 |
| Q1 | GO:0001849 | complement component C1q complex binding            | 2 |
| Q1 | IDPO:00053 | molten globule to order                             | 2 |
| Q1 | IDPO:00055 | pre-molten globule to order                         | 2 |
| Q1 | GO:0043167 | ion binding                                         | 2 |
| Q1 | GO:0051238 | sequestering of metal ion                           | 2 |
| Q1 | GO:1900407 | regulation of cellular response to oxidative stress | 2 |
| Q1 | IDPO:00504 | flexible C-terminal tail                            | 2 |
| Q1 | GO:0044183 | protein folding chaperone                           | 2 |
| Q1 | GO:0046872 | metal ion binding                                   | 2 |
| Q1 | GO:0003729 | mRNA binding                                        | 2 |
| Q1 | GO:1905761 | SCF ubiquitin ligase complex binding                | 1 |
| Q1 | GO:1900037 | regulation of cellular response to hypoxia          | 1 |
| Q1 | IDPO:00508 | self-assembly                                       | 1 |
| Q1 | IDPO:00032 | palmitoylation display site                         | 1 |
| Q1 | IDPO:00024 | molecular recognition display site                  | 1 |
| Q1 | GO:0005161 | platelet-derived growth factor receptor binding     | 1 |
| Q1 | GO:0070734 | histone H3-K27 methylation                          | 1 |
| Q1 | GO:0005506 | iron ion binding                                    | 1 |
| Q1 | GO:0071569 | protein ufmylation                                  | 1 |
| Q1 | GO:1905906 | regulation of amyloid fibril formation              | 1 |

|    |            |                                                                 |     |
|----|------------|-----------------------------------------------------------------|-----|
| Q2 | IDPO:00076 | disorder                                                        | 228 |
| Q2 | GO:0005515 | protein binding                                                 | 76  |
| Q2 | IDPO:00050 | disorder to order                                               | 59  |
| Q2 | GO:0060090 | molecular adaptor activity                                      | 21  |
| Q2 | IDPO:00502 | flexible linker/spacer                                          | 15  |
| Q2 | GO:0098772 | molecular function regulator                                    | 12  |
| Q2 | GO:0140678 | molecular function inhibitor activity                           | 10  |
| Q2 | GO:0003677 | DNA binding                                                     | 8   |
| Q2 | GO:0003676 | nucleic acid binding                                            | 7   |
| Q2 | IDPO:00025 | phosphorylation display site                                    | 6   |
| Q2 | IDPO:00079 | order                                                           | 6   |
| Q2 | GO:1990000 | amyloid fibril formation                                        | 6   |
| Q2 | GO:0051179 | localization                                                    | 5   |
| Q2 | GO:0008289 | lipid binding                                                   | 5   |
| Q2 | GO:0036094 | small molecule binding                                          | 3   |
| Q2 | IDPO:00056 | order to disorder                                               | 3   |
| Q2 | GO:0061912 | selective autophagy                                             | 2   |
| Q2 | IDPO:00077 | molten globule                                                  | 2   |
| Q2 | GO:0001849 | complement component C1q complex binding                        | 2   |
| Q2 | GO:0031625 | ubiquitin protein ligase binding                                | 2   |
| Q2 | IDPO:00026 | acetylation display site                                        | 2   |
| Q2 | IDPO:00027 | methylation display site                                        | 2   |
| Q2 | GO:0003723 | RNA binding                                                     | 2   |
| Q2 | GO:0046872 | metal ion binding                                               | 2   |
| Q2 | IDPO:00052 | disorder to pre-molten globule                                  | 1   |
| Q2 | GO:1904030 | negative regulation of cyclin-dependent protein kinase activity | 1   |
| Q2 | GO:0045893 | positive regulation of transcription, DNA-templated             | 1   |
| Q2 | GO:0008285 | negative regulation of cell population proliferation            | 1   |
| Q2 | GO:0009968 | negative regulation of signal transduction                      | 1   |
| Q2 | GO:0010468 | regulation of gene expression                                   | 1   |
| Q2 | GO:0003714 | transcription corepressor activity                              | 1   |
| Q2 | GO:0010507 | negative regulation of autophagy                                | 1   |
| Q2 | IDPO:00029 | ubiquitination display site                                     | 1   |

|    |            |                                         |     |
|----|------------|-----------------------------------------|-----|
| Q2 | GO:0005049 | nuclear export signal receptor activity | 1   |
| Q2 | IDPO:00504 | flexible C-terminal tail                | 1   |
| Q2 | IDPO:00506 | self-inhibition                         | 1   |
| Q2 | GO:0097351 | toxin sequestering activity             | 1   |
| Q2 | IDPO:00078 | pre-molten globule                      | 1   |
| Q2 | GO:0140693 | molecular condensate scaffold activity  | 1   |
| Q2 | GO:0019843 | rRNA binding                            | 1   |
| Q2 | GO:0044183 | protein folding chaperone               | 1   |
| Q2 | IDPO:00051 | disorder to molten globule              | 1   |
| Q2 | IDPO:00058 | order to pre-molten globule             | 1   |
| Q2 | GO:0140677 | molecular function activator activity   | 1   |
| Q2 | GO:0140691 | RNA folding chaperone                   | 1   |
| Q2 | IDPO:00028 | glycosylation display site              | 1   |
| Q2 | IDPO:00501 | entropic chain                          | 1   |
| Q2 | GO:0005506 | iron ion binding                        | 1   |
| Q2 | IDPO:00033 | limited proteolysis display site        | 1   |
| Q2 | GO:1905906 | regulation of amyloid fibril formation  | 1   |
| Q3 | IDPO:00076 | disorder                                | 454 |
| Q3 | GO:0005515 | protein binding                         | 73  |
| Q3 | IDPO:00050 | disorder to order                       | 38  |
| Q3 | IDPO:00502 | flexible linker/spacer                  | 37  |
| Q3 | IDPO:00025 | phosphorylation display site            | 17  |
| Q3 | GO:0098772 | molecular function regulator            | 17  |
| Q3 | GO:0060090 | molecular adaptor activity              | 13  |
| Q3 | GO:0140678 | molecular function inhibitor activity   | 10  |
| Q3 | GO:0140677 | molecular function activator activity   | 7   |
| Q3 | IDPO:00056 | order to disorder                       | 6   |
| Q3 | GO:0008289 | lipid binding                           | 6   |
| Q3 | IDPO:00024 | molecular recognition display site      | 5   |
| Q3 | GO:0003676 | nucleic acid binding                    | 5   |
| Q3 | GO:0051179 | localization                            | 5   |
| Q3 | IDPO:00506 | self-inhibition                         | 4   |
| Q3 | GO:0030246 | carbohydrate binding                    | 4   |

|    |            |                                                  |      |
|----|------------|--------------------------------------------------|------|
| Q3 | GO:0061912 | selective autophagy                              | 4    |
| Q3 | GO:1905761 | SCF ubiquitin ligase complex binding             | 3    |
| Q3 | IDPO:00503 | flexible N-terminal tail                         | 2    |
| Q3 | GO:0044183 | protein folding chaperone                        | 2    |
| Q3 | IDPO:00027 | methylation display site                         | 2    |
| Q3 | IDPO:00026 | acetylation display site                         | 2    |
| Q3 | IDPO:00079 | order                                            | 2    |
| Q3 | IDPO:00504 | flexible C-terminal tail                         | 2    |
| Q3 | GO:0140537 | transcription regulator activator activity       | 2    |
| Q3 | GO:0036094 | small molecule binding                           | 2    |
| Q3 | GO:0003723 | RNA binding                                      | 2    |
| Q3 | GO:0019835 | cytolysis                                        | 1    |
| Q3 | GO:0005516 | calmodulin binding                               | 1    |
| Q3 | IDPO:00077 | molten globule                                   | 1    |
| Q3 | GO:0001094 | TFIID-class transcription factor complex binding | 1    |
| Q3 | IDPO:00055 | pre-molten globule to order                      | 1    |
| Q3 | IDPO:00501 | entropic chain                                   | 1    |
| Q3 | GO:0043232 | intracellular non-membrane-bounded organelle     | 1    |
| Q3 | GO:0140693 | molecular condensate scaffold activity           | 1    |
| Q3 | GO:1990000 | amyloid fibril formation                         | 1    |
| Q3 | IDPO:00032 | palmitoylation display site                      | 1    |
| Q3 | GO:0003677 | DNA binding                                      | 1    |
| Q3 | IDPO:00028 | glycosylation display site                       | 1    |
| Q3 | GO:0000049 | tRNA binding                                     | 1    |
| Q3 | GO:0006111 | regulation of gluconeogenesis                    | 1    |
| Q3 | GO:0045722 | positive regulation of gluconeogenesis           | 1    |
| Q3 | GO:0140313 | molecular sequestering activity                  | 1    |
| Q3 | IDPO:00505 | self-regulatory activity                         | 1    |
| Q3 | GO:0098792 | xenophagy                                        | 1    |
| Q4 | IDPO:00076 | disorder                                         | 1194 |
| Q4 | GO:0005515 | protein binding                                  | 304  |
| Q4 | IDPO:00050 | disorder to order                                | 122  |
| Q4 | IDPO:00502 | flexible linker/spacer                           | 111  |

|    |            |                                              |    |
|----|------------|----------------------------------------------|----|
| Q4 | GO:0060090 | molecular adaptor activity                   | 81 |
| Q4 | IDPO:00025 | phosphorylation display site                 | 59 |
| Q4 | GO:0098772 | molecular function regulator                 | 40 |
| Q4 | GO:0140678 | molecular function inhibitor activity        | 24 |
| Q4 | GO:0003676 | nucleic acid binding                         | 23 |
| Q4 | GO:0140677 | molecular function activator activity        | 21 |
| Q4 | GO:0003677 | DNA binding                                  | 21 |
| Q4 | GO:0051179 | localization                                 | 19 |
| Q4 | GO:0140693 | molecular condensate scaffold activity       | 19 |
| Q4 | GO:0043167 | ion binding                                  | 12 |
| Q4 | IDPO:00501 | entropic chain                               | 12 |
| Q4 | IDPO:00078 | pre-molten globule                           | 12 |
| Q4 | GO:0044183 | protein folding chaperone                    | 12 |
| Q4 | GO:0008289 | lipid binding                                | 10 |
| Q4 | GO:0003723 | RNA binding                                  | 9  |
| Q4 | GO:0036094 | small molecule binding                       | 9  |
| Q4 | IDPO:00506 | self-inhibition                              | 9  |
| Q4 | GO:0031625 | ubiquitin protein ligase binding             | 7  |
| Q4 | IDPO:00056 | order to disorder                            | 7  |
| Q4 | IDPO:00079 | order                                        | 6  |
| Q4 | GO:0043232 | intracellular non-membrane-bounded organelle | 6  |
| Q4 | IDPO:00033 | limited proteolysis display site             | 6  |
| Q4 | IDPO:00503 | flexible N-terminal tail                     | 5  |
| Q4 | IDPO:00504 | flexible C-terminal tail                     | 5  |
| Q4 | IDPO:00508 | self-assembly                                | 5  |
| Q4 | IDPO:00024 | molecular recognition display site           | 5  |
| Q4 | IDPO:00028 | glycosylation display site                   | 4  |
| Q4 | IDPO:00029 | ubiquitination display site                  | 4  |
| Q4 | IDPO:00026 | acetylation display site                     | 4  |
| Q4 | IDPO:00052 | disorder to pre-molten globule               | 4  |
| Q4 | GO:0061912 | selective autophagy                          | 4  |
| Q4 | GO:0002039 | p53 binding                                  | 3  |
| Q4 | GO:1990000 | amyloid fibril formation                     | 3  |



|    |            |                                                      |   |
|----|------------|------------------------------------------------------|---|
| Q4 | IDPO:00077 | molten globule                                       | 3 |
| Q4 | GO:0030246 | carbohydrate binding                                 | 3 |
| Q4 | GO:0010508 | positive regulation of autophagy                     | 3 |
| Q4 | GO:0002151 | G-quadruplex RNA binding                             | 2 |
| Q4 | IDPO:00027 | methylation display site                             | 2 |
| Q4 | IDPO:00051 | disorder to molten globule                           | 2 |
| Q4 | IDPO:00060 | pre-molten globule to molten globule                 | 2 |
| Q4 | GO:0140691 | RNA folding chaperone                                | 2 |
| Q4 | GO:1990316 | Atg1/ULK1 kinase complex                             | 2 |
| Q4 | GO:0001223 | transcription coactivator binding                    | 2 |
| Q4 | GO:0140313 | molecular sequestering activity                      | 2 |
| Q4 | GO:0140486 | zinc ion sequestering activity                       | 2 |
| Q4 | GO:0046872 | metal ion binding                                    | 2 |
| Q4 | GO:0005516 | calmodulin binding                                   | 2 |
| Q4 | GO:0008285 | negative regulation of cell population proliferation | 1 |
| Q4 | GO:0001933 | negative regulation of protein phosphorylation       | 1 |
| Q4 | GO:0001934 | positive regulation of protein phosphorylation       | 1 |
| Q4 | GO:0140311 | protein sequestering activity                        | 1 |
| Q4 | GO:1990757 | ubiquitin ligase activator activity                  | 1 |
| Q4 | GO:0051168 | nuclear export                                       | 1 |
| Q4 | GO:0140487 | metal ion sequestering activity                      | 1 |
| Q4 | GO:0003713 | transcription coactivator activity                   | 1 |
| Q4 | GO:0017025 | TBP-class protein binding                            | 1 |
| Q4 | GO:0071889 | 14-3-3 protein binding                               | 1 |
| Q4 | GO:0008301 | DNA binding, bending                                 | 1 |
| Q4 | GO:0043621 | protein self-association                             | 1 |
| Q4 | GO:0030308 | negative regulation of cell growth                   | 1 |
| Q4 | IDPO:00030 | fatty acylation display site                         | 1 |
| Q4 | GO:0051238 | sequestering of metal ion                            | 1 |
| Q4 | IDPO:00055 | pre-molten globule to order                          | 1 |
| Q4 | IDPO:00034 | ADP-ribosylation display site                        | 1 |
| Q4 | GO:0031396 | regulation of protein ubiquitination                 | 1 |
| Q4 | GO:0005506 | iron ion binding                                     | 1 |

|    |            |                                             |   |
|----|------------|---------------------------------------------|---|
| Q4 | GO:0010506 | regulation of autophagy                     | 1 |
| Q4 | GO:0039521 | suppression by virus of host autophagy      | 1 |
| Q4 | GO:0051647 | nucleus localization                        | 1 |
| Q4 | GO:0016301 | kinase activity                             | 1 |
| Q4 | GO:0042393 | histone binding                             | 1 |
| Q4 | GO:0070772 | PAS complex                                 | 1 |
| Q4 | GO:0060341 | regulation of cellular localization         | 1 |
| Q4 | GO:1905463 | negative regulation of DNA duplex unwinding | 1 |
| Q4 | GO:0051101 | regulation of DNA binding                   | 1 |
| Q4 | GO:0032092 | positive regulation of protein binding      | 1 |
| Q4 | GO:0000049 | tRNA binding                                | 1 |
| Q4 | GO:0032508 | DNA duplex unwinding                        | 1 |
| Q4 | GO:0008270 | zinc ion binding                            | 1 |
| Q4 | GO:0140314 | calcium ion sequestering activity           | 1 |
| Q4 | GO:0033596 | TSC1-TSC2 complex                           | 1 |
| Q4 | GO:0070585 | protein localization to mitochondrion       | 1 |
| Q4 | GO:1903146 | regulation of autophagy of mitochondrion    | 1 |
